# Supplementary material
Source: PubMed Central journal article supplement (PMC3045779)
Supplement: NIHMS267524-supplement-Supplementary.pdf [file NIHMS267524-supplement-Supplementary.pdf]

# European Journal of Immunology

Supporting Information  
for  
DOI XXX/eji.200939741

NTPDase1 governs P2X<sub>7</sub>-dependent functions in murine macrophages

Sébastien A. Lévesque, Filip Kukulski, Keiichi Enjyoji, Simon C. Robson and  
Jean Sévigny

**Supplementary Table 1): Primer pairs for PCR and products size.**

| Gene                          | Forward primer                  | Reverse primer           | Genbank   | Length (bp) |
|-------------------------------|---------------------------------|--------------------------|-----------|-------------|
| <b>RT-PCR</b>                 |                                 |                          |           |             |
| <i>P2rx1</i>                  | CAACTGTGTGCCCTTCAATG            | GGTACCATTACCTCCTCCA      | NM_008771 | 196         |
| <i>P2rx2</i>                  | CAAGGCACCCCTCAAGTAGA            | TCAGTCAGAGCAGAGCTGGA     | NM_153400 | 193         |
| <i>P2rx3</i>                  | ATTCCTCAAAGGGGCTGAT             | GTTCTGCAGCCCAAGGATAA     | NM_145526 | 204         |
| <i>P2rx4</i>                  | ATCCCTTCTGCCCCATATTC            | TAGCCAGGAGACACGTTGTG     | NM_011026 | 205         |
| <i>P2rx5</i>                  | CTGTCACTTCAGCTCCACCA            | TTTGTGTCCAGACGGTTGA      | NM_033321 | 196         |
| <i>P2rx6</i>                  | TCACCCGCTAACCCCTGTTAC           | TAGTCCCGCTGAAGCTTTGT     | NM_011028 | 242         |
| <i>P2rx7</i>                  | AATCGGTGTGTTTCCTTTGG            | CCGGGTGACTTTGTTGTCT      | NM_011027 | 165         |
| <i>P2ry1</i>                  | TCGTGTCTCCATTCTGCTTG            | CGACAGGGTTTATGCCACTT     | NM_008772 | 218         |
| <i>P2ry2</i>                  | TGACGACTCAAGACGGACAG            | GTCCCTACAGCTCCCTAC       | NM_008773 | 108         |
| <i>P2ry4</i>                  | ACTGGCTTCTGCAAGTTCGT            | AGGCAGCCAGCTACTACCAA     | NM_020621 | 188         |
| <i>P2ry6</i>                  | GGTAGCGCTGGAAGCTAATG            | TTTCAAGCGACTGCTGCTAA     | NM_183168 | 308         |
| <i>P2ry12</i>                 | GGCAGCCTTGAGTGTCTTC             | ATAACGTGCTACCCGACCTG     | NM_027571 | 130         |
| <i>P2ry13</i>                 | ATAGAGAACCGGAACAGCA             | CAAAACAAAGCTGATGCTCG     | NM_028808 | 115         |
| <i>P2ry14</i>                 | TTTTGTCGTCTGCTTTGTGC            | GCAGCCGAGAGTAGCAGAGT     | NM_133200 | 135         |
| <i>Entpd1</i>                 | AGCTGCCCTTATGGAAGAT             | TCAGTCCACAGCAATCAAA      | NM_009848 | 123         |
| <i>Entpd2</i>                 | TTCCTGGGATGTCAGGTCTC            | GTCTCTGGTGCTTGCCTTTC     | NM_009849 | 132         |
| <i>Entpd3</i>                 | ACCTGTCCCGTGCTTAAATG            | AGACAGAGTGAAGCCCCTGA     | NM_178676 | 183         |
| <i>Entpd8</i>                 | CACACAGGACCTTCTGAGCA            | AGCCTTCTGAGGTGGCACTA     | NM_028093 | 212         |
| <i>Nt5e</i>                   | CAGGAAATCCACCTTCCAAA            | AACCTTCAGGTAGCCAGGT      | NM_011851 | 128         |
| <i>Gapdh</i>                  | AACTTTGGCATTGTGGAAGG            | ACACATTGGGGGTAGGAACA     | NM_008084 | 223         |
| <b>qPCR</b>                   |                                 |                          |           |             |
| <i>P2rx7</i>                  | Z-tail-CCTACATTAGCTTTGCTTTGGTGA | GCTCTTCCGCTGGTACAGC      | NM_011027 | 52          |
| <i>IL-1<math>\beta</math></i> | Z-tail-AAATGCCACCTTTGACAGTGAT   | CGTCAACTTCAAAGAACAGGTCAT | NM_008361 | 50          |
| <i>18S</i>                    | Z-tail-TGCATGTCTAAGTACGCACGG    | AATGAGCCATTTCGAGTTTCA    | X56974    | 50          |

The Z-tail for qPCR was ACTGAACCTGACCGTACA. It was excluded from the qPCR product length presented in base pair (bp).
